# Supplementary material
Source: publisher figshare collection journal article supplement (https://osapublishing.figshare.com/ndownloader/files/24685778)
Supplement: Supplementary file 1 [file 24685778]

## Discrete dispersion scan setup for measuring few-cycle laser pulses in the mid-infrared: supplement

**NILS C. GEIB,<sup>1,\*</sup>  RICHARD HOLLINGER,<sup>2,3</sup> ELISSA HADDAD,<sup>4</sup> PAUL HERRMANN,<sup>2</sup> FRANÇOIS LÉGARÉ,<sup>4</sup> THOMAS PERTSCH,<sup>1,7</sup> CHRISTIAN SPIELMANN,<sup>2,3</sup>  MICHAEL ZÜRCH,<sup>2,5,6</sup> AND FALK EILENBERGER<sup>1,7</sup>**

<sup>1</sup>*Institute of Applied Physics, Abbe Center of Photonics, Friedrich Schiller University Jena, Albert-Einstein-Str. 15, 07745 Jena, Germany*

<sup>2</sup>*Institute of Optics and Quantum Electronics, Abbe Center of Photonics, Friedrich Schiller University Jena, Max-Wien-Platz 1, 07743 Jena, Germany*

<sup>3</sup>*Helmholtz Institute Jena, Fröbelstieg 3, 07743 Jena, Germany*

<sup>4</sup>*INRS-EMT, 1650 boulevard Lionel-Boulet, Varennes, Québec J3X1S2, Canada*

<sup>5</sup>*Fritz Haber Institute of the Max Planck Society, 14195 Berlin, Germany*

<sup>6</sup>*University of California at Berkeley, Department of Chemistry, Berkeley, California 94720, USA*

<sup>7</sup>*Fraunhofer Institute for Applied Optics and Precision Engineering IOF, Center for Excellence in Photonics, Albert-Einstein-Str. 7, 07745 Jena, Germany*

\*Corresponding author: [nils.geib@uni-jena.de](mailto:nils.geib@uni-jena.de)

---

This supplement published with The Optical Society on 15 September 2020 by The Authors under the terms of the [Creative Commons Attribution 4.0 License](https://creativecommons.org/licenses/by/4.0/) in the format provided by the authors and unedited. Further distribution of this work must maintain attribution to the author(s) and the published article's title, journal citation, and DOI.

Supplement DOI: <https://doi.org/10.6084/m9.figshare.12789269>

Parent Article DOI: <https://doi.org/10.1364/OL.403362>

# Discrete dispersion scan setup for measuring few-cycle laser pulses in the mid-infrared: supplemental document

This document contains supplemental material to our publication “Discrete dispersion scan setup for measuring few-cycle laser pulses in the mid-infrared”.

## 1. FROG MEASUREMENT

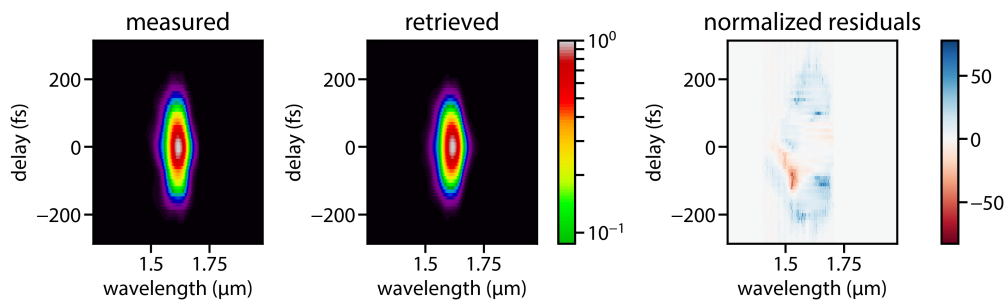

**Fig. S1.** FROG measurement: raw trace (left), retrieved trace (middle) and the residuals weighted by the sample standard deviation.

In the main paper we verified the discrete d-scan measurement with a separate FROG measurement of the same pulse. The measured and retrieved FROG traces as well as the residuals weighted by the standard deviation  $\sigma$  as estimated from repeated measurements are shown in Fig. S1. The FROG error is 0.57 %.
